# Supplementary material for: Studies on the drastic improvement of photocatalytic degradation of acid orange-74 dye by TPPO capped CuO nanoparticles in tandem with suitable electron capturing agents
Source: Royal Society of Chemistry journal article supplement (doi:10.1039/c5ra04179a), 2015-01-01
Supplement: c5ra04179a1.pdf [file c5ra04179a1.pdf]

## Supplementary Data

### Studies on drastic improvement of photocatalytic degradation of acid orange -74 dye by TPPO capped CuO nanoparticles in tandem with suitable electron capturing agents

Aarti Sharma<sup>1</sup>, Raj Kumar Dutta<sup>1,2\*</sup>

Centre of Nanotechnology, Department of Chemistry, Indian Institute of Technology Roorkee,  
Roorkee – 247667, India

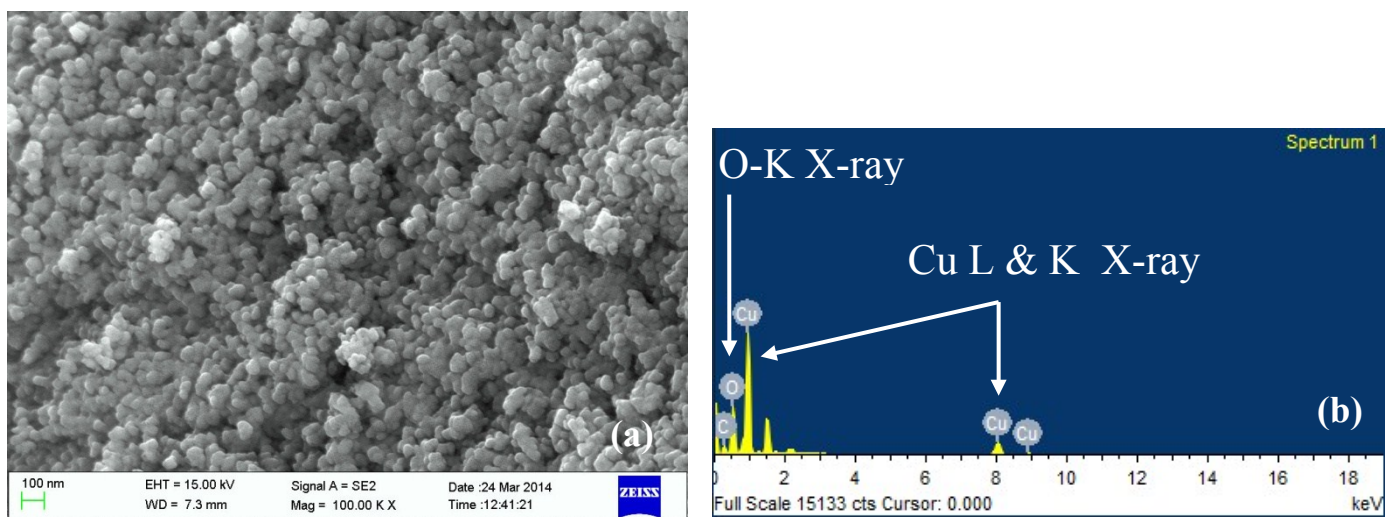

Fig.S1

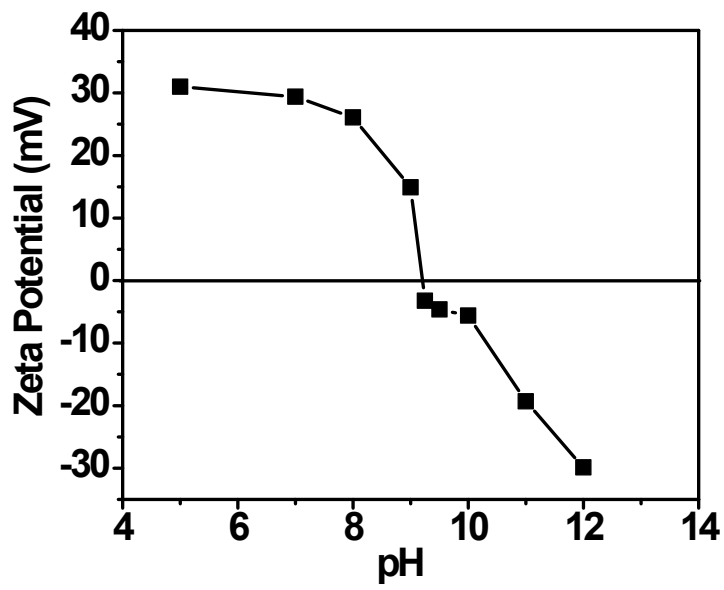

Fig. S2

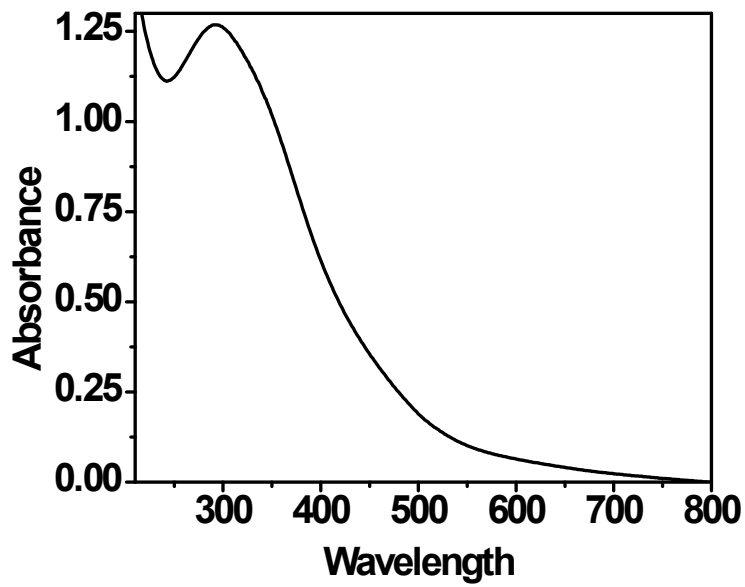

Fig. S3(a)

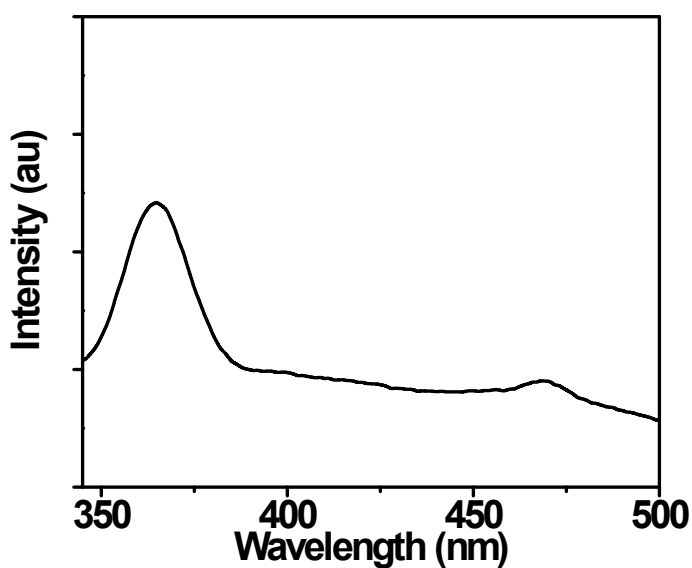

Fig. S3(b)

#### SUPPLEMENTARY FIGURE CAPTION

Fig. S1 Scanning electron microscope (SEM) of TPPO capped CuO NPs; (b) EDAX spectrum of TPPO capped CuO NPs showing characteristic K and L X-rays of Cu and O.

Fig. S2 Zeta potential ( $\zeta$ ) of TPPO capped CuO nanoparticles at different pH.

Fig. S3(a) UV-Vis absorption spectra of TPPO capped CuO NPs showing  $\lambda_{\text{max}}$  at 290 nm, respectively.

Fig. S3(b) Fluorescence emission spectra of CuO@TPPO NPs measured at  $\lambda_{\text{ex}}$  300 nm
